# Supplementary material
Source: publisher site journal article supplement (https://www.dovepress.com/article/301138)

# Supplementary figure 1: 16S rRNA gene phylogenetic tree of the genus *Pandoraea* including the patient strains.

The strains of the patients are marked with Strain 1 and 2, corresponding to the strains in the case report. The closest related species is *Pandoraea pnomenusa*. CLC Main Workbench (version 20.0.4, QIAGEN Aarhus A/S) was used to create the phylogenetic tree. (Settings: Construction method = Neighbor Joining, Nucleotide substitution model = Jukes Cantor, Protein substitution model = WAG, Transition / transversion ratio = 2.0, Include rate variation = No, Number of substitution rate categories = 4, Gamma distribution parameter = 1.0, Estimate substitution rate parameter(s) = Yes, Estimate topology = Yes, Estimate gamma distribution parameter = No, Perform bootstrap analysis = Yes, Replicates = 1'000) Reference sequences were obtained from <https://lpsn.dsmz.de/genus/pandoraea>, Record number: 516248, date last accessed: 11.02.2021. *Burkholderia cenocepacia* LMG16656 (J2315) was used as outgroup.

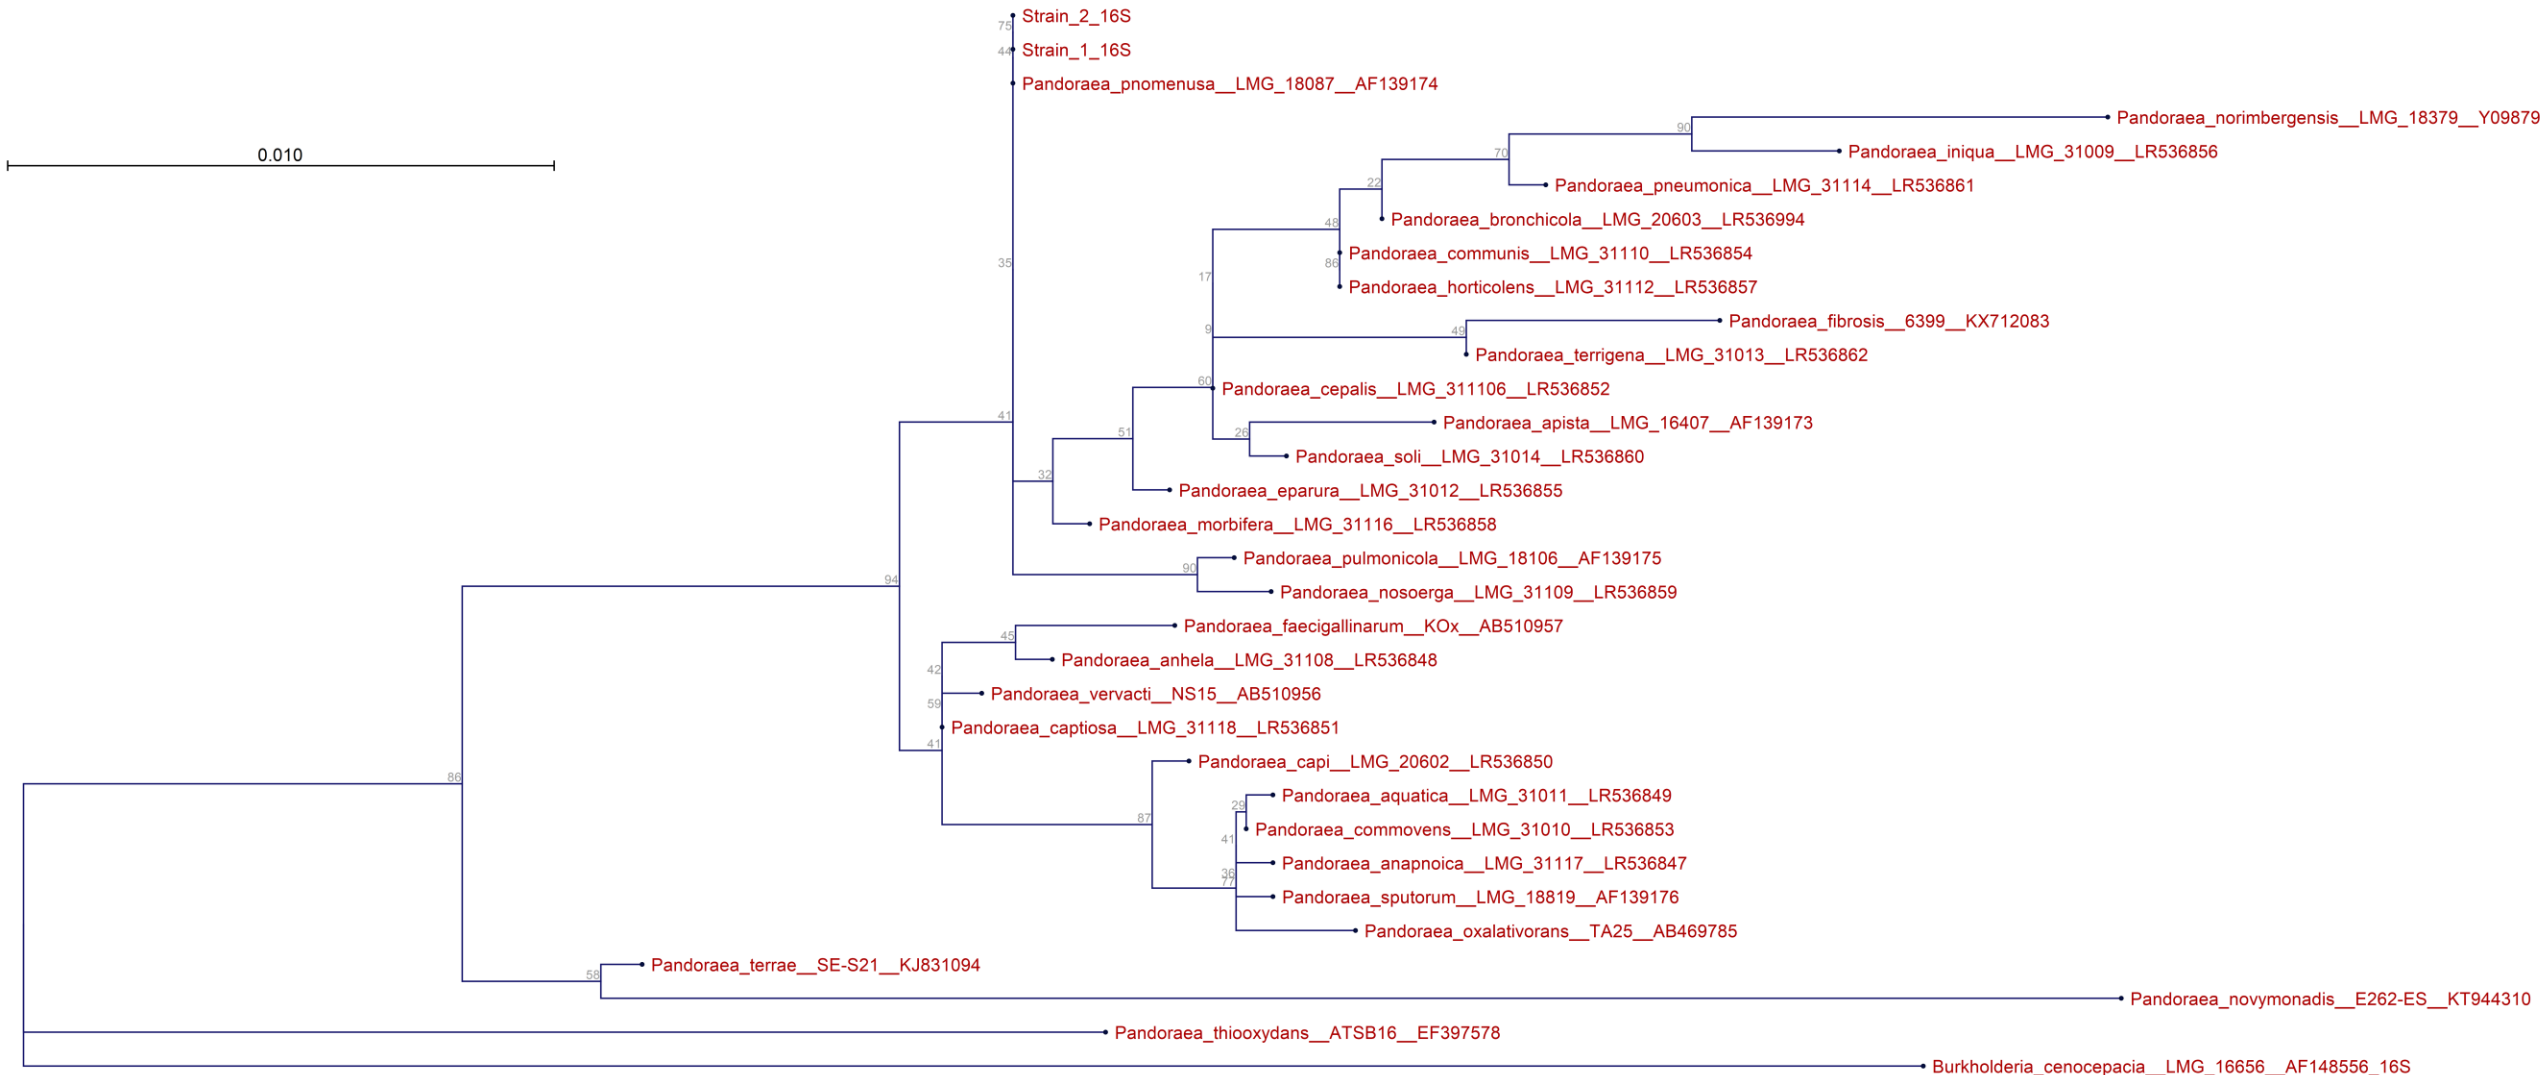

Supplement: Supplementary file 1 [file get_supplementary_file.php]
